# Supplementary material for: Novel CRISPR/Cas9 gene drive constructs reveal insights into mechanisms of resistance allele formation and drive efficiency in genetically diverse populations
Source: PLOS journal article supplement (doi:10.1371/journal.pgen.1006796), 2017-07-20
Supplement: S1 (10.1371/journal.pgen.1006796.s001) [file journal.pgen.1006796.s001]

**A****homozygous female**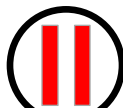germline Cas9  
expression**germline cell**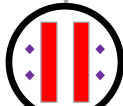

meiosis

**gamete**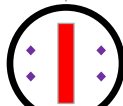

100%

fertilization  
by WT male**female embryo**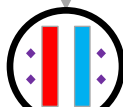

3:7

**somatic cell**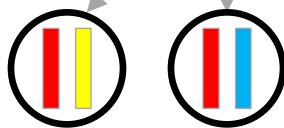**B****heterozygous female**  
with resistance allele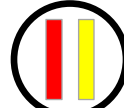germline Cas9  
expression**germline cell**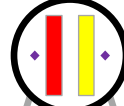

meiosis

**gamete**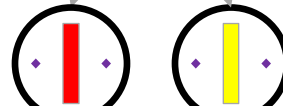

50%

50%

fertilization  
by WT male**female embryo**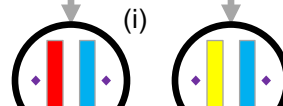

2:8

8:2

**somatic cell**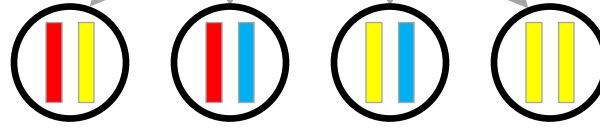**C****drive male**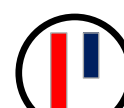germline Cas9  
expression**germline cell**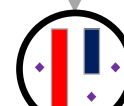

meiosis

**gamete**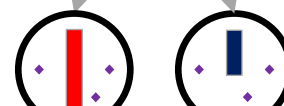

50%

50%

fertilization  
in WT female**embryo**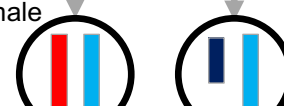**somatic cell**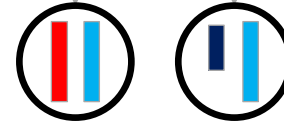

wild type

driver

resistance

Y-chromosome

Cas9
