# Supplementary material for: Novel CRISPR/Cas9 gene drive constructs reveal insights into mechanisms of resistance allele formation and drive efficiency in genetically diverse populations
Source: PLOS journal article supplement (doi:10.1371/journal.pgen.1006796), 2017-07-20

# Germline Event Type Correlation

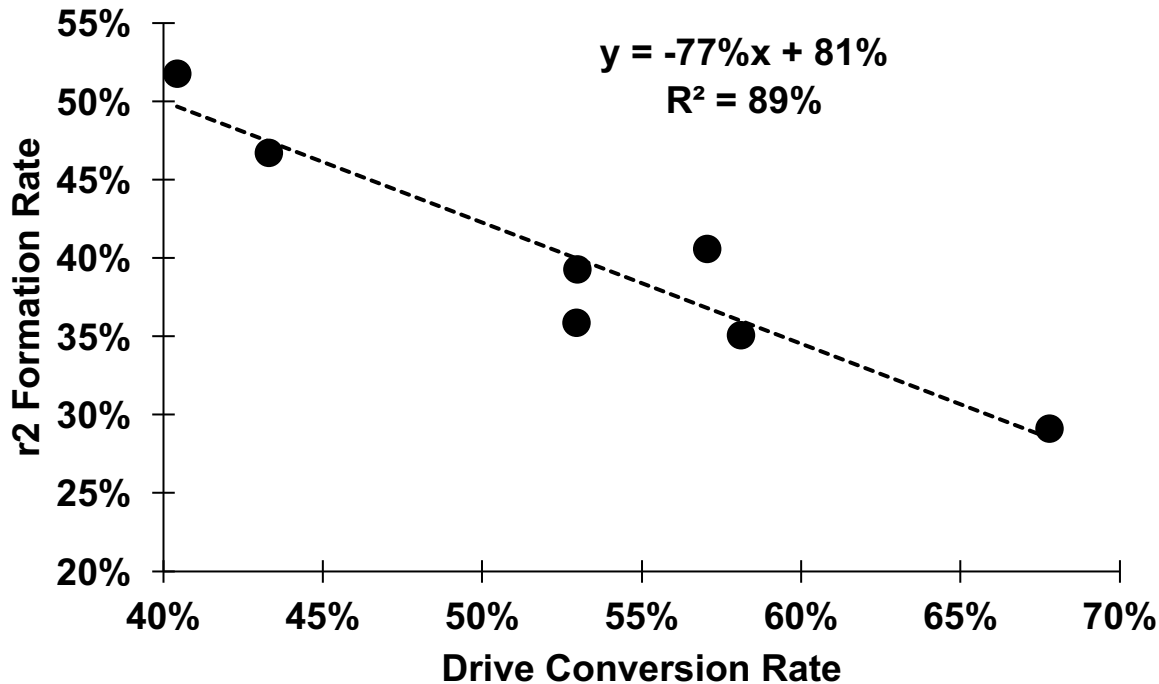

Supplement: S2 (10.1371/journal.pgen.1006796.s002) [file journal.pgen.1006796.s002]
